# Supplementary material for: Whole-chromosome hitchhiking driven by a male-killing endosymbiont
Source: PubMed Central journal article supplement (PMC7046192; doi:10.1371/journal.pbio.3000610), 2020-02-27
Supplement: pbio.3000610.s016.pdf [file pbio.3000610.s016.pdf]

**S2 Table. Inferred genome properties based on k-mer content**

|         | <b>Heterozygosity</b> | <b>Haploid length</b> | <b>Repeat Length</b> | <b>Unique Length</b> | <b>Read Error Rate</b> |
|---------|-----------------------|-----------------------|----------------------|----------------------|------------------------|
| Minimum | 0.0302                | ~249 Mb               | 105.6 Mb             | 143.2 Mb             | 0.00151                |
| Maximum | 0.0306                | ~249.2 Mb             | 105.7 Mb             | 143.4 Mb             | 0.00151                |
