# Supplementary material for: Whole-chromosome hitchhiking driven by a male-killing endosymbiont
Source: PubMed Central journal article supplement (PMC7046192; doi:10.1371/journal.pbio.3000610), 2020-02-27
Supplement: pbio.3000610.s018.pdf [file pbio.3000610.s018.pdf]

**S4 Table. Summarized results of the CEGMA analysis based on 248 CEGs**

| <b>Groups</b> | <b>Number of Proteins</b> | <b>Completeness</b> | <b>Total</b> | <b>Average</b> | <b>Percentage of Orthologs</b> |
|---------------|---------------------------|---------------------|--------------|----------------|--------------------------------|
| Complete      | 192                       | 77.42               | 224          | 1.17           | 13.02                          |
| Group 1       | 52                        | 78.89               | 58           | 1.12           | 11.54                          |
| Group 2       | 42                        | 75.00               | 48           | 1.14           | 9.52                           |
| Group 3       | 45                        | 73.77               | 52           | 1.16           | 13.33                          |
| Group 4       | 53                        | 81.54               | 66           | 1.25           | 16.98                          |
| Partial       | 224                       | 90.32               | 304          | 1.36           | 28.57                          |
| Group 1       | 60                        | 90.91               | 75           | 1.25           | 23.33                          |
| Group 2       | 47                        | 83.93               | 67           | 1.43           | 31.91                          |
| Group 3       | 55                        | 90.16               | 75           | 1.36           | 29.09                          |
| Group 4       | 62                        | 95.38               | 87           | 1.40           | 30.65                          |
