# Supplementary material for: Whole-chromosome hitchhiking driven by a male-killing endosymbiont
Source: PubMed Central journal article supplement (PMC7046192; doi:10.1371/journal.pbio.3000610), 2020-02-27
Supplement: pbio.3000610.s025.pdf [file pbio.3000610.s025.pdf]

**S11 Table. Details of genotyping assays**

| <b>Assay Details</b>                                                        | <b>Target</b>                                                              | <b>Forward primer</b>      | <b>Reverse primer</b>  |
|-----------------------------------------------------------------------------|----------------------------------------------------------------------------|----------------------------|------------------------|
| “sc11_PCR_RFLP_2”<br>(Fragment length<br>polymorphisms without<br>cleavage) | sc0000011<br>571266-571486<br>(chr15)                                      | AAGAGTTTTAGCGCCGTAAG       | CAACTCCTTGTCGTAATGATGA |
| “sc120_PCR_RFLP_2”<br>RFLP with enzyme<br>NdeI                              | sc0000120<br>387153-387517<br>(chr15)                                      | CTTTCGCAAAGCCAAGGGAC       | TAATCGAGGCGACCACAGTG   |
| “COI2”<br>Sequencing and RFLP<br>with enzyme BsmI                           | Cytochrome Oxidase<br>Subunit I (COI),<br>Mitochondrial                    | GCTTAAACTCAGCCATTTTATTAGCG | TGGATCTCCTCCTCCAGCAG   |
| “GDP1”<br>PCR assay for<br><i>Spiroplasma</i> infection                     | <i>Spiroplasma</i> glycerophosphoryl diester phospho-diesterase (GDP) gene | GAAAATTTGCCAAGCAGTAGAG     | AACTACGGAAATTGAAGGATGC |
